# Supplementary material
Source: PubMed Central journal article supplement (PMC4432782)
Supplement: Supp_Data.pdf [file Supp_Data.pdf]

## Supplementary Data

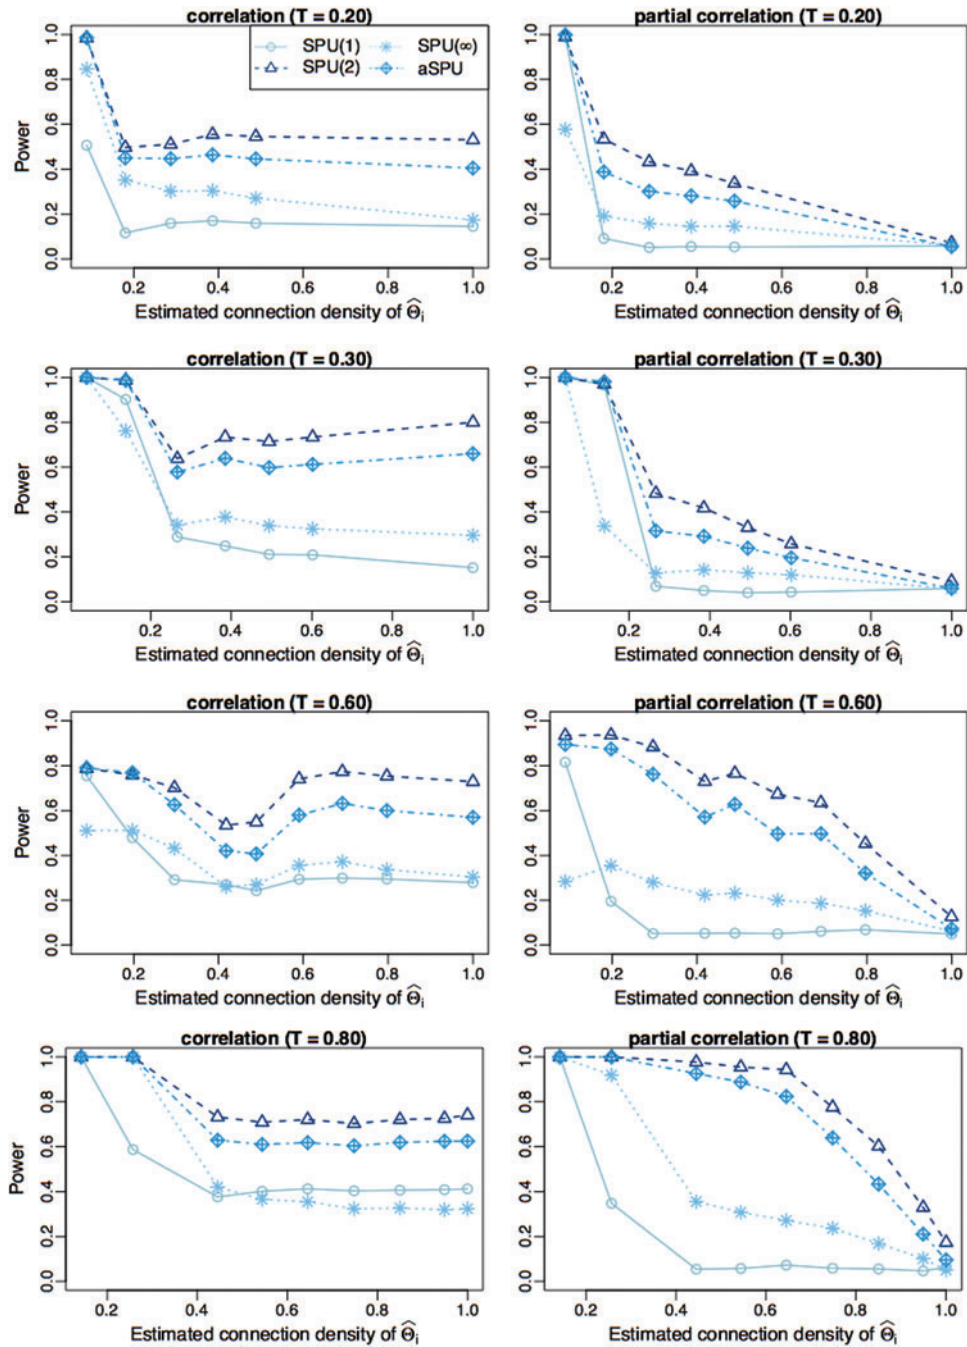

**SUPPLEMENTARY FIG. S1.** Power of sum of powered score (SPU) and adaptive sum of powered score (aSPU) for testing brain network differences with varying connection density of the estimated precision matrix at given true connection density ( $T$ ) of  $\Theta$ .

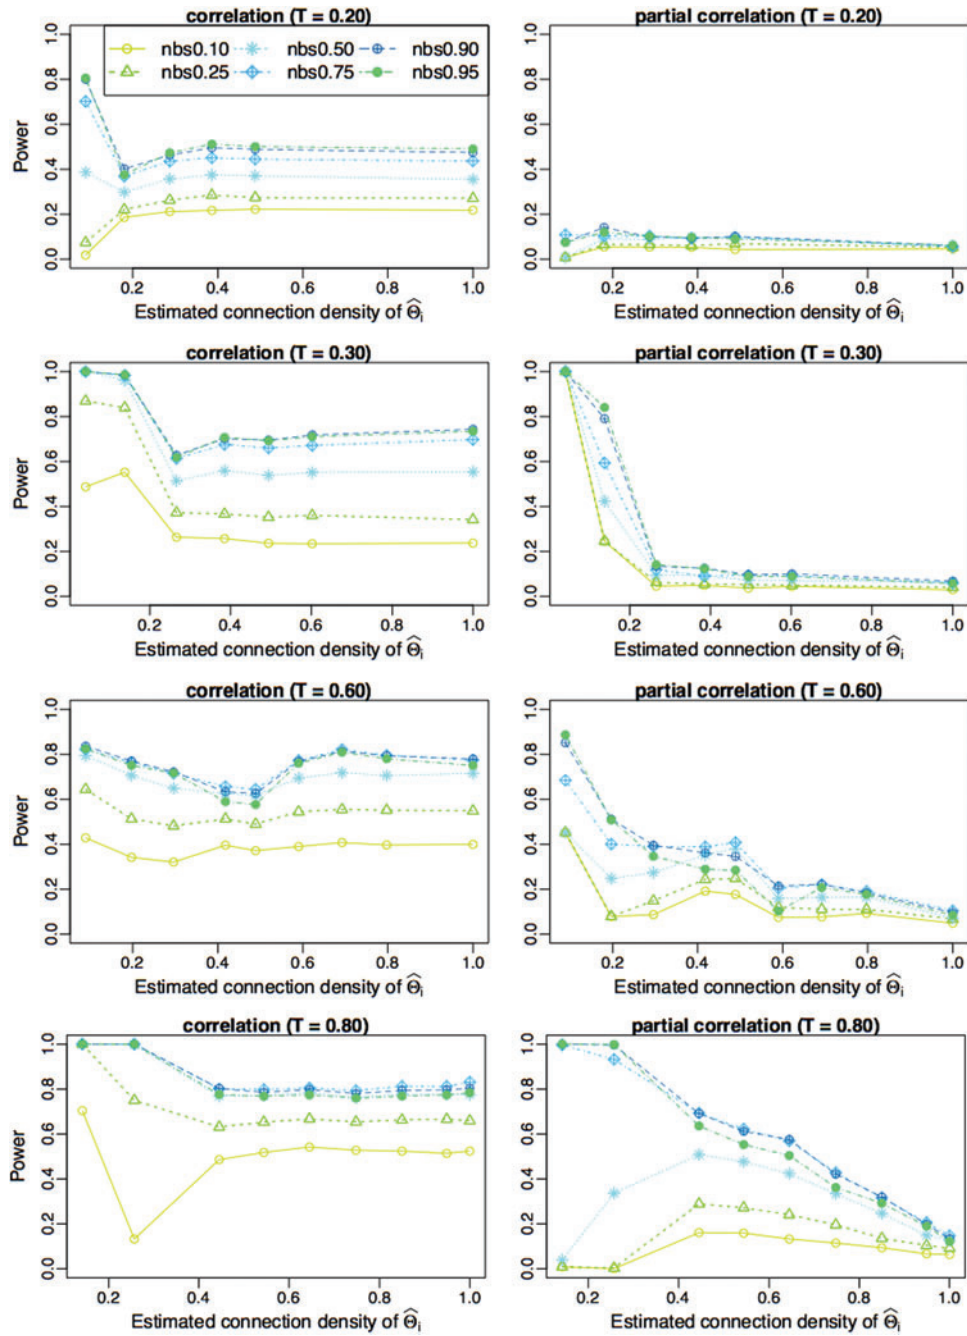

**SUPPLEMENTARY FIG. S2.** Power of nbs for testing brain network differences with varying connection density of the estimated precision matrix at given true connection density ( $T$ ) of  $\Theta$ .

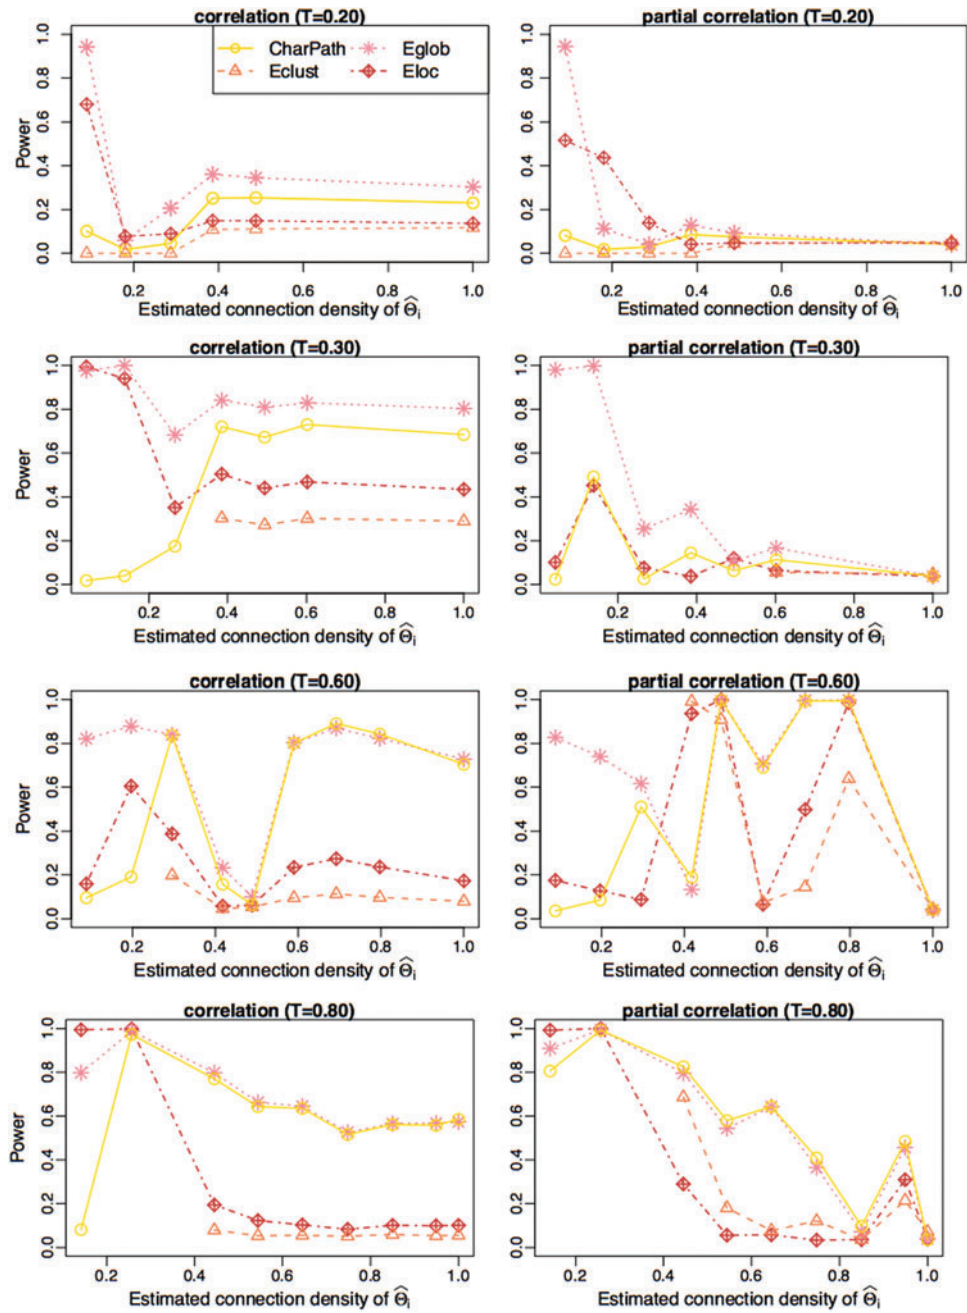

**SUPPLEMENTARY FIG. S3.** Power of network measures for testing brain network differences with varying connection density of the estimated precision matrix at given true connection density ( $T$ ) of  $\Theta$ .
