# Supplementary material
Source: PubMed Central journal article supplement (PMC4432782)
Supplement: Supp_Table1.pdf [file Supp_Table1.pdf]

SUPPLEMENTARY TABLE S1. TYPE I ERROR RATES FOR TESTING GROUP DIFFERENCES USING CORRELATIONS AS EDGE WEIGHTS AT DIFFERENT SPARSITY LEVELS OF THE TRUE PRECISION MATRIX ( $J$ ) AND OF THE ESTIMATED PRECISION MATRIX ( $c$ ) BASED ON 1000 REPLICATES IN EACH CASE

| Group | IT | Group 2 | T | Estimated $c$ | $SPU(1)$ | $SPU(2)$ | $SPU(\infty)$ | aSPU  | $nbs(0.1)$ | $nbs(0.25)$ | $nbs(0.50)$ | $nbs(0.75)$ | $nbs(0.90)$ | $nbs(0.95)$ | Charpath | Eclust | Eglob | Eloc  |
|-------|----|---------|---|---------------|----------|----------|---------------|-------|------------|-------------|-------------|-------------|-------------|-------------|----------|--------|-------|-------|
| 0.18  |    | 0.234   |   | 1             | 0.052    | 0.054    | 0.048         | 0.054 | 0.049      | 0.04        | 0.05        | 0.051       | 0.052       | 0.055       | 0.041    | 0.036  | 0.041 | 0.034 |
|       |    |         |   | 0.488         | 0.062    | 0.044    | 0.005         | 0.056 | 0.045      | 0.047       | 0.049       | 0.052       | 0.048       | 0.056       | 0.04     | 0.035  | 0.041 | 0.034 |
|       |    |         |   | 0.387         | 0.055    | 0.044    | 0.048         | 0.055 | 0.045      | 0.046       | 0.05        | 0.047       | 0.048       | 0.055       | 0.04     | 0.036  | 0.042 | 0.034 |
|       |    |         |   | 0.285         | 0.052    | 0.046    | 0.053         | 0.052 | 0.047      | 0.044       | 0.045       | 0.05        | 0.05        | 0.054       | 0.04     | 0.042  | 0.041 | 0.044 |
|       |    |         |   | 0.176         | 0.049    | 0.044    | 0.055         | 0.05  | 0.045      | 0.045       | 0.048       | 0.039       | 0.048       | 0.047       | 0.046    | 0.049  | 0.044 | 0.049 |
|       |    |         |   | 0.084         | 0.051    | 0.042    | 0.052         | 0.049 | 0.039      | 0.041       | 0.043       | 0.034       | 0.035       | 0.033       | 0.047    | 0.049  | 0.046 | 0.047 |
| 0.252 |    | 0.314   |   | 1             | 0.058    | 0.044    | 0.056         | 0.055 | 0.053      | 0.058       | 0.055       | 0.055       | 0.005       | 0.05        | 0.046    | 0.049  | 0.043 | 0.046 |
|       |    |         |   | 0.541         | 0.057    | 0.047    | 0.06          | 0.058 | 0.051      | 0.051       | 0.058       | 0.049       | 0.055       | 0.051       | 0.047    | 0.05   | 0.044 | 0.05  |
|       |    |         |   | 0.432         | 0.057    | 0.046    | 0.065         | 0.056 | 0.051      | 0.051       | 0.055       | 0.05        | 0.055       | 0.057       | 0.059    | 0.051  | 0.06  | 0.054 |
|       |    |         |   | 0.335         | 0.057    | 0.047    | 0.06          | 0.056 | 0.056      | 0.048       | 0.05        | 0.049       | 0.052       | 0.056       | 0.044    | 0.052  | 0.051 | 0.052 |
|       |    |         |   | 0.23          | 0.055    | 0.042    | 0.072         | 0.058 | 0.057      | 0.048       | 0.056       | 0.048       | 0.052       | 0.053       | 0.052    | 0.05   | 0.054 | 0.059 |
|       |    |         |   | 0.127         | 0.061    | 0.048    | 0.063         | 0.051 | 0.053      | 0.056       | 0.054       | 0.054       | 0.052       | 0.048       | 0.058    | 0.049  | 0.05  | 0.046 |
|       |    |         |   | 0.043         | 0.053    | 0.044    | 0.057         | 0.048 | 0.055      | 0.052       | 0.052       | 0.047       | 0.041       | 0.045       | 0.049    | 0.047  | 0.041 | 0.046 |
| 0.508 |    | 0.633   |   | 1             | 0.049    | 0.047    | 0.051         | 0.044 | 0.031      | 0.036       | 0.04        | 0.038       | 0.034       | 0.039       | 0.044    | 0.031  | 0.036 | 0.04  |
|       |    |         |   | 0.811         | 0.048    | 0.045    | 0.051         | 0.045 | 0.032      | 0.04        | 0.041       | 0.037       | 0.039       | 0.043       | 0.048    | 0.048  | 0.042 | 0.036 |
|       |    |         |   | 0.708         | 0.049    | 0.046    | 0.05          | 0.046 | 0.05       | 0.042       | 0.04        | 0.035       | 0.036       | 0.036       | 0.047    | 0.039  | 0.042 | 0.043 |
|       |    |         |   | 0.594         | 0.048    | 0.045    | 0.048         | 0.045 | 0.047      | 0.046       | 0.041       | 0.038       | 0.04        | 0.041       | 0.045    | 0.064  | 0.055 | 0.049 |
|       |    |         |   | 0.446         | 0.044    | 0.044    | 0.048         | 0.048 | 0.042      | 0.036       | 0.042       | 0.036       | 0.04        | 0.043       | 0.049    | 0.043  | 0.052 | 0.049 |
|       |    |         |   | 0.387         | 0.048    | 0.045    | 0.053         | 0.048 | 0.043      | 0.039       | 0.042       | 0.038       | 0.038       | 0.044       | 0.047    | 0.039  | 0.042 | 0.043 |
|       |    |         |   | 0.276         | 0.05     | 0.046    | 0.062         | 0.048 | 0.039      | 0.042       | 0.041       | 0.042       | 0.04        | 0.044       | 0.038    | 0.058  | 0.052 | 0.042 |
|       |    |         |   | 0.178         | 0.053    | 0.038    | 0.058         | 0.052 | 0.046      | 0.047       | 0.039       | 0.042       | 0.043       | 0.042       | 0.037    | 0.039  | 0.043 | 0.048 |
|       |    |         |   | 0.082         | 0.052    | 0.045    | 0.064         | 0.055 | 0.049      | 0.046       | 0.038       | 0.043       | 0.038       | 0.033       | 0.054    | 0.045  | 0.044 | 0.041 |
| 0.748 |    | 0.912   |   | 1             | 0.05     | 0.049    | 0.047         | 0.05  | 0.051      | 0.046       | 0.048       | 0.047       | 0.045       | 0.045       | 0.049    | 0.038  | 0.051 | 0.041 |
|       |    |         |   | 0.945         | 0.05     | 0.049    | 0.047         | 0.05  | 0.051      | 0.045       | 0.048       | 0.045       | 0.045       | 0.044       | 0.045    | 0.054  | 0.037 | 0.047 |
|       |    |         |   | 0.843         | 0.051    | 0.048    | 0.047         | 0.047 | 0.05       | 0.045       | 0.052       | 0.048       | 0.045       | 0.042       | 0.036    | 0.045  | 0.051 | 0.049 |
|       |    |         |   | 0.736         | 0.051    | 0.049    | 0.043         | 0.052 | 0.049      | 0.045       | 0.054       | 0.045       | 0.044       | 0.041       | 0.047    | 0.037  | 0.047 | 0.051 |
|       |    |         |   | 0.64          | 0.051    | 0.047    | 0.039         | 0.049 | 0.048      | 0.047       | 0.053       | 0.047       | 0.042       | 0.042       | 0.035    | 0.047  | 0.037 | 0.039 |
|       |    |         |   | 0.537         | 0.053    | 0.048    | 0.04          | 0.044 | 0.046      | 0.049       | 0.052       | 0.051       | 0.041       | 0.038       | 0.049    | 0.044  | 0.055 | 0.05  |
|       |    |         |   | 0.438         | 0.048    | 0.048    | 0.035         | 0.048 | 0.048      | 0.051       | 0.049       | 0.054       | 0.04        | 0.04        | 0.045    | 0.04   | 0.043 | 0.041 |
|       |    |         |   | 0.24          | 0.053    | 0.053    | 0.064         | 0.047 | 0.053      | 0.05        | 0.048       | 0.047       | 0.046       | 0.054       | 0.043    | 0.041  | 0.04  | 0.035 |
|       |    |         |   | 0.136         | 0.059    | 0.05     | 0.051         | 0.053 | 0.047      | 0.047       | 0.05        | 0.048       | 0.052       | 0.05        | 0.035    | 0.035  | 0.035 | 0.04  |

aSPU, adaptive sum of powered score; SPU, sum of powered score.
