# Supplementary material
Source: PubMed Central journal article supplement (PMC4432782)
Supplement: Supp_Table2.pdf [file Supp_Table2.pdf]

SUPPLEMENTARY TABLE S2. TYPE I ERROR RATES FOR TESTING GROUP DIFFERENCES USING PARTIAL CORRELATIONS AS EDGE WEIGHTS AT DIFFERENT SPARSITY LEVELS OF THE TRUE PRECISION MATRIX ( $T$ ) AND OF THE ESTIMATED PRECISION MATRIX ( $c$ ) BASED ON 1000 REPLICATES IN EACH CASE

| Group | IT    | Group | 2T    | Estimated $c$ | $SPU(1)$ | $SPU(2)$ | $SPU(\infty)$ | $aSPU$ | $nbs(0.1)$ | $nbs(0.25)$ | $nbs(0.50)$ | $nbs(0.75)$ | $nbs(0.90)$ | $nbs(0.95)$ | Charpath | Eclust | Eglob | Eloc  |       |
|-------|-------|-------|-------|---------------|----------|----------|---------------|--------|------------|-------------|-------------|-------------|-------------|-------------|----------|--------|-------|-------|-------|
| 0.18  | 0.234 | 1     | 0.062 | 0.054         | 0.048    | 0.054    | 0.052         | 0.046  | 0.057      | 0.053       | 0.046       | 0.046       | 0.046       | 0.046       | 0.048    | 0.047  | 0.046 | 0.054 |       |
|       |       | 0.488 | 0.062 | 0.044         | 0.05     | 0.056    | 0.048         | 0.049  | 0.049      | 0.04        | 0.056       | 0.049       | 0.065       | 0.065       | 0.039    | 0.042  | 0.038 | 0.038 |       |
|       |       | 0.387 | 0.058 | 0.044         | 0.048    | 0.055    | 0.04          | 0.038  | 0.038      | 0.059       | 0.052       | 0.038       | 0.059       | 0.048       | 0.039    | 0.04   | 0.038 | 0.038 |       |
|       |       | 0.285 | 0.052 | 0.046         | 0.053    | 0.052    | 0.042         | 0.047  | 0.047      | 0.052       | 0.051       | 0.046       | 0.061       | 0.046       | 0.047    | 0.053  | 0.047 | 0.04  |       |
|       |       | 0.176 | 0.049 | 0.044         | 0.055    | 0.05     | 0.05          | 0.045  | 0.045      | 0.04        | 0.043       | 0.041       | 0.041       | 0.045       | 0.05     | 0.035  | 0.035 | 0.035 |       |
|       |       | 0.084 | 0.051 | 0.042         | 0.062    | 0.049    | 0.051         | 0.051  | 0.048      | 0.051       | 0.048       | 0.047       | 0.052       | 0.045       | 0.043    | 0.041  | 0.04  | 0.035 |       |
|       |       | 1     | 0.045 | 0.045         | 0.049    | 0.039    | 0.058         | 0.042  | 0.051      | 0.051       | 0.051       | 0.048       | 0.048       | 0.05        | 0.05     | 0.438  | 0.039 | 0.04  | 0.037 |
|       |       | 0.541 | 0.06  | 0.056         | 0.049    | 0.044    | 0.054         | 0.052  | 0.043      | 0.043       | 0.043       | 0.041       | 0.04        | 0.04        | 0.035    | 0.047  | 0.045 | 0.048 | 0.049 |
|       |       | 0.432 | 0.063 | 0.053         | 0.055    | 0.043    | 0.068         | 0.047  | 0.048      | 0.048       | 0.048       | 0.036       | 0.038       | 0.038       | 0.052    | 0.048  | 0.048 | 0.035 | 0.048 |
|       |       | 0.335 | 0.062 | 0.053         | 0.047    | 0.051    | 0.048         | 0.054  | 0.052      | 0.052       | 0.053       | 0.053       | 0.053       | 0.044       | 0.044    | 0.047  | 0.053 | 0.049 | 0.046 |
| 0.252 | 0.314 | 0.23  | 0.06  | 0.05          | 0.049    | 0.059    | 0.044         | 0.044  | 0.048      | 0.054       | 0.064       | 0.064       | 0.053       | 0.039       | 0.039    | 0.049  | 0.048 | 0.047 |       |
|       |       | 0.127 | 0.062 | 0.052         | 0.053    | 0.055    | 0.05          | 0.05   | 0.053      | 0.053       | 0.045       | 0.032       | 0.034       | 0.034       | 0.046    | 0.054  | 0.043 | 0.041 |       |
|       |       | 0.043 | 0.055 | 0.05          | 0.056    | 0.044    | 0.035         | 0.035  | 0.035      | 0.035       | 0.035       | 0.044       | 0.044       | 0.042       | 0.049    | 0.035  | 0.05  | 0.045 |       |
|       |       | 1     | 0.051 | 0.064         | 0.043    | 0.056    | 0.038         | 0.041  | 0.046      | 0.046       | 0.056       | 0.064       | 0.064       | 0.054       | 0.052    | 0.04   | 0.038 | 0.043 |       |
|       |       | 0.811 | 0.048 | 0.054         | 0.038    | 0.047    | 0.036         | 0.045  | 0.045      | 0.051       | 0.049       | 0.046       | 0.046       | 0.043       | 0.038    | 0.044  | 0.042 | 0.053 |       |
|       |       | 0.708 | 0.048 | 0.055         | 0.037    | 0.045    | 0.048         | 0.047  | 0.047      | 0.047       | 0.044       | 0.044       | 0.044       | 0.045       | 0.035    | 0.035  | 0.035 | 0.044 |       |
|       |       | 0.594 | 0.053 | 0.059         | 0.036    | 0.049    | 0.035         | 0.05   | 0.05       | 0.059       | 0.042       | 0.04        | 0.04        | 0.039       | 0.034    | 0.046  | 0.044 | 0.043 |       |
|       |       | 0.446 | 0.049 | 0.052         | 0.039    | 0.05     | 0.042         | 0.05   | 0.042      | 0.042       | 0.04        | 0.032       | 0.032       | 0.04        | 0.045    | 0.049  | 0.039 | 0.048 |       |
|       |       | 0.387 | 0.054 | 0.047         | 0.043    | 0.046    | 0.053         | 0.045  | 0.047      | 0.047       | 0.044       | 0.039       | 0.039       | 0.053       | 0.04     | 0.038  | 0.043 | 0.044 |       |
|       |       | 0.276 | 0.051 | 0.051         | 0.044    | 0.051    | 0.053         | 0.045  | 0.045      | 0.045       | 0.049       | 0.045       | 0.045       | 0.056       | 0.041    | 0.048  | 0.047 | 0.049 |       |
| 0.508 | 0.633 | 0.178 | 0.058 | 0.049         | 0.054    | 0.037    | 0.041         | 0.041  | 0.035      | 0.047       | 0.037       | 0.037       | 0.039       | 0.042       | 0.042    | 0.045  | 0.052 | 0.032 |       |
|       |       | 0.082 | 0.061 | 0.055         | 0.043    | 0.061    | 0.052         | 0.052  | 0.052      | 0.052       | 0.045       | 0.042       | 0.042       | 0.032       | 0.044    | 0.041  | 0.053 | 0.045 |       |
|       |       | 1     | 0.051 | 0.056         | 0.05     | 0.056    | 0.042         | 0.039  | 0.039      | 0.048       | 0.056       | 0.056       | 0.056       | 0.047       | 0.032    | 0.047  | 0.045 | 0.039 |       |
|       |       | 0.945 | 0.055 | 0.062         | 0.048    | 0.055    | 0.039         | 0.035  | 0.035      | 0.052       | 0.055       | 0.056       | 0.056       | 0.054       | 0.45     | 0.048  | 0.048 | 0.035 |       |
|       |       | 0.843 | 0.054 | 0.068         | 0.049    | 0.05     | 0.046         | 0.051  | 0.051      | 0.05        | 0.059       | 0.062       | 0.062       | 0.058       | 0.05     | 0.051  | 0.046 | 0.048 |       |
|       |       | 0.736 | 0.059 | 0.061         | 0.045    | 0.054    | 0.037         | 0.047  | 0.047      | 0.051       | 0.056       | 0.056       | 0.056       | 0.05        | 0.046    | 0.047  | 0.039 | 0.049 |       |
|       |       | 0.64  | 0.056 | 0.059         | 0.046    | 0.047    | 0.043         | 0.052  | 0.052      | 0.045       | 0.053       | 0.046       | 0.046       | 0.053       | 0.049    | 0.047  | 0.05  | 0.051 |       |
|       |       | 0.537 | 0.05  | 0.052         | 0.04     | 0.038    | 0.043         | 0.044  | 0.044      | 0.038       | 0.042       | 0.051       | 0.051       | 0.045       | 0.04     | 0.038  | 0.034 | 0.039 |       |
|       |       | 0.438 | 0.044 | 0.047         | 0.037    | 0.047    | 0.051         | 0.041  | 0.041      | 0.048       | 0.047       | 0.049       | 0.047       | 0.045       | 0.047    | 0.047  | 0.042 | 0.042 | 0.035 |
|       |       | 0.24  | 0.042 | 0.041         | 0.038    | 0.039    | 0.052         | 0.054  | 0.054      | 0.046       | 0.039       | 0.04        | 0.04        | 0.033       | 0.054    | 0.054  | 0.04  | 0.04  |       |
| 0.748 | 0.912 | 0.136 | 0.044 | 0.048         | 0.046    | 0.04     | 0.044         | 0.044  | 0.069      | 0.051       | 0.064       | 0.064       | 0.048       | 0.045       | 0.045    | 0.045  | 0.049 | 0.039 |       |
